# Supplementary material
Source: Springer Nature journal article supplement (https://www.springermedizin.de/resource/supplementary/12958_2010_756_MOESM6_ESM.pdf/9568410)

200

MW(kDa)

10

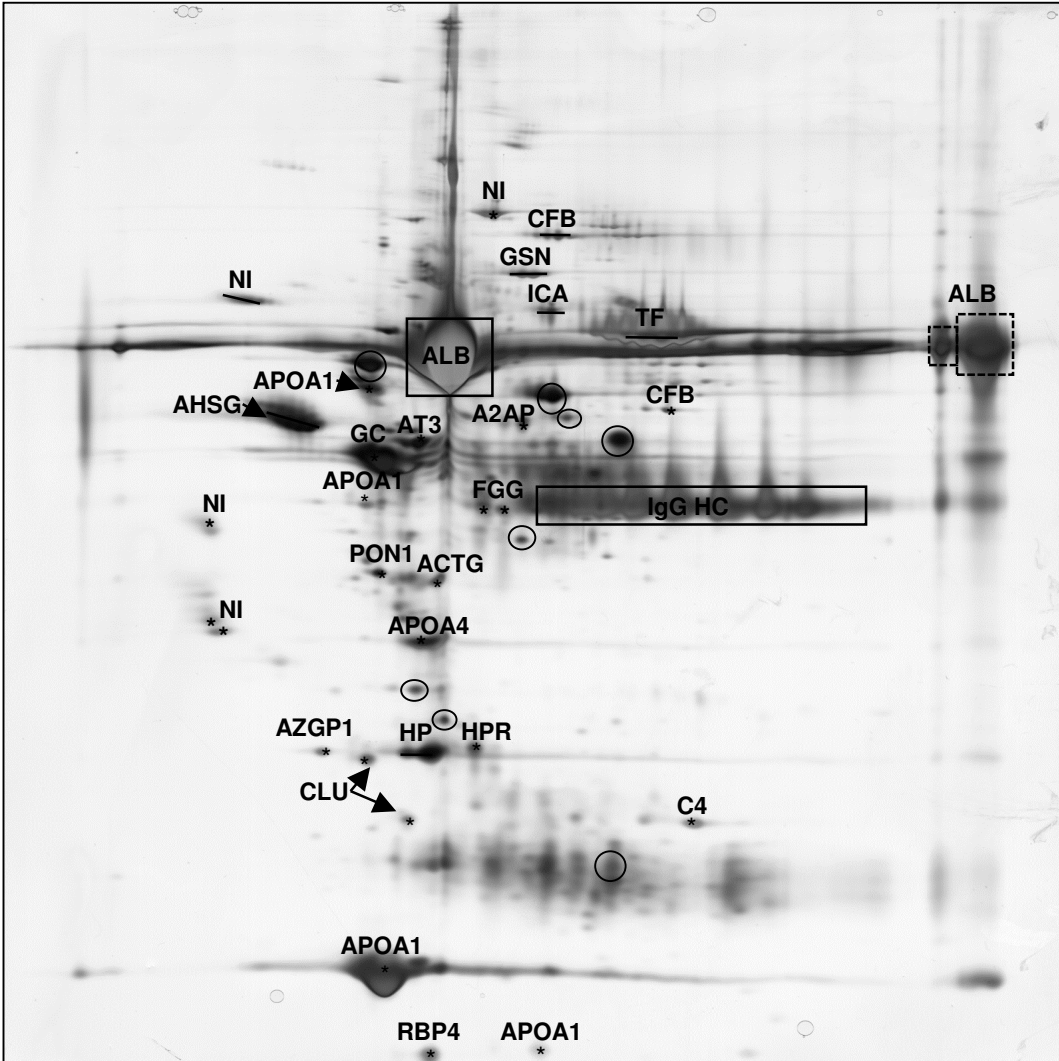

Supplement: MOESM6 [file 9568410]
